# Supplementary material for: Tweets Matter: Quantifying the Spatio-Temporal Relationship Between Social Media Activism and Physical Protest
Source: Research Square preprint supplement (doi:10.21203/rs.3.rs-1488943/v1), 2022-03-25
Supplement: Supplementary file 1 [file 96a4e58ac82786060acbc17f.pdf]

## Supplementary Information for

### **The spatio-temporal relationship between social media activism and physical protest: evidence from #JusticeForGeorgeFloyd**

Leonardo Nicoletti, Trivik Verma, Paolo Santi, and Martijn Warnier

Correspondence to: [info.leonardonicoletti@gmail.com](mailto:info.leonardonicoletti@gmail.com)

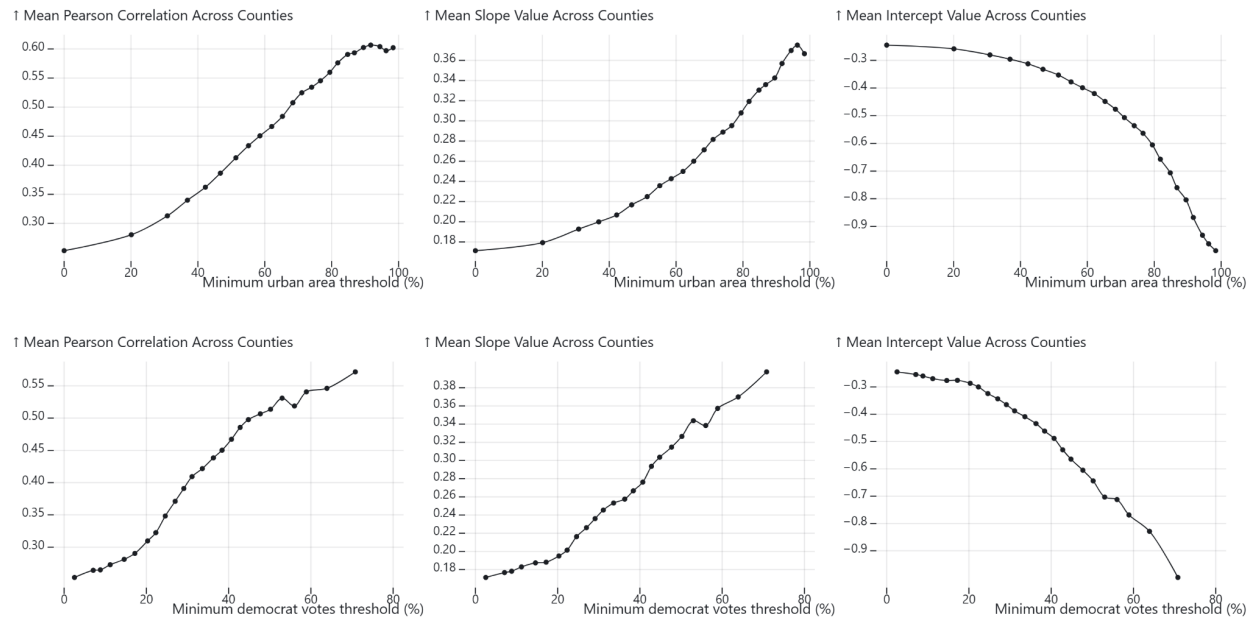

**Figure S1.** Evolution of power regression parameters (for the power relationship between daily number of tweets and daily number of protests) with population density (top), urban area (middle), and democratic votes turnout (bottom).

| state | pearson_r | r2    |
|-------|-----------|-------|
| AK    | 0.627     | 0.393 |
| WY    | 0.575     | 0.331 |
| MT    | 0.629     | 0.396 |
| ND    | 0.480     | 0.230 |
| SD    | 0.715     | 0.512 |
| NM    | 0.742     | 0.551 |
| ID    | 0.447     | 0.200 |
| NE    | 0.764     | 0.583 |
| NV    | 0.505     | 0.255 |
| KS    | 0.663     | 0.439 |
| UT    | 0.715     | 0.511 |
| ME    | 0.709     | 0.503 |
| OR    | 0.807     | 0.651 |
| CO    | 0.768     | 0.589 |
| IA    | 0.868     | 0.754 |
| OK    | 0.524     | 0.275 |
| AR    | 0.643     | 0.414 |
| MS    | 0.711     | 0.505 |
| AZ    | 0.743     | 0.552 |
| VT    | 0.614     | 0.377 |
| MN    | 0.823     | 0.678 |
| WV    | 0.784     | 0.615 |
| MO    | 0.777     | 0.604 |
| AL    | 0.726     | 0.528 |
| WI    | 0.731     | 0.534 |
| LA    | 0.725     | 0.525 |
| TX    | 0.829     | 0.686 |
| KY    | 0.715     | 0.511 |
| WA    | 0.835     | 0.697 |
| NH    | 0.689     | 0.475 |
| TN    | 0.832     | 0.692 |
| SC    | 0.811     | 0.658 |
| MI    | 0.834     | 0.695 |
| GA    | 0.839     | 0.705 |
| IN    | 0.824     | 0.679 |
| NC    | 0.836     | 0.699 |
| VA    | 0.858     | 0.736 |
| HI    | 0.744     | 0.554 |
| IL    | 0.805     | 0.648 |
| CA    | 0.923     | 0.853 |
| OH    | 0.795     | 0.632 |
| PA    | 0.797     | 0.635 |
| FL    | 0.811     | 0.658 |
| NY    | 0.869     | 0.755 |
| DE    | 0.329     | 0.108 |
| MD    | 0.692     | 0.480 |
| CT    | 0.726     | 0.527 |
| MA    | 0.764     | 0.583 |
| RI    | 0.598     | 0.358 |
| NJ    | 0.757     | 0.573 |
| DC    | 0.391     | 0.153 |

**Table S1.** Results for state-level power regressions between daily number of tweets and daily number of physical protests.

| granger_relationship        | p_value | state |
|-----------------------------|---------|-------|
| tweet_count ->protest_count | 0.0     | AK    |
| tweet_count ->protest_count | 0.0     | AL    |
| tweet_count ->protest_count | 0.0     | AR    |
| tweet_count ->protest_count | 0.0     | AZ    |
| tweet_count ->protest_count | 0.0     | CA    |
| tweet_count ->protest_count | 0.0     | CO    |
| tweet_count ->protest_count | 0.0     | CT    |
| tweet_count ->protest_count | 0.0     | DC    |
| tweet_count ->protest_count | 0.4189  | DE    |
| tweet_count ->protest_count | 0.0     | FL    |
| tweet_count ->protest_count | 0.0     | GA    |
| tweet_count ->protest_count | 0.0     | HI    |
| tweet_count ->protest_count | 0.0     | IA    |
| tweet_count ->protest_count | 0.0247  | ID    |
| tweet_count ->protest_count | 0.0     | IL    |
| tweet_count ->protest_count | 0.0     | IN    |
| tweet_count ->protest_count | 0.0     | KS    |
| tweet_count ->protest_count | 0.0     | KY    |
| tweet_count ->protest_count | 0.0     | LA    |
| tweet_count ->protest_count | 0.0     | MA    |
| tweet_count ->protest_count | 0.0     | MD    |
| tweet_count ->protest_count | 0.0     | ME    |
| tweet_count ->protest_count | 0.0     | MI    |
| tweet_count ->protest_count | 0.0     | MN    |
| tweet_count ->protest_count | 0.0     | MO    |
| tweet_count ->protest_count | 0.0     | MS    |
| tweet_count ->protest_count | 0.0071  | MT    |
| tweet_count ->protest_count | 0.0     | NC    |
| tweet_count ->protest_count | 0.2303  | ND    |
| tweet_count ->protest_count | 0.0     | NE    |
| tweet_count ->protest_count | 0.0061  | NH    |
| tweet_count ->protest_count | 0.0     | NJ    |
| tweet_count ->protest_count | 0.0     | NM    |
| tweet_count ->protest_count | 0.0     | NV    |
| tweet_count ->protest_count | 0.0     | NY    |
| tweet_count ->protest_count | 0.0     | OH    |
| tweet_count ->protest_count | 0.0     | OK    |
| tweet_count ->protest_count | 0.0     | OR    |
| tweet_count ->protest_count | 0.0     | PA    |
| tweet_count ->protest_count | 0.0062  | RI    |
| tweet_count ->protest_count | 0.0     | SC    |
| tweet_count ->protest_count | 0.0     | SD    |
| tweet_count ->protest_count | 0.0     | TN    |
| tweet_count ->protest_count | 0.0     | TX    |
| tweet_count ->protest_count | 0.0     | USA   |
| tweet_count ->protest_count | 0.0     | UT    |
| tweet_count ->protest_count | 0.0     | VA    |
| tweet_count ->protest_count | 0.0     | VT    |
| tweet_count ->protest_count | 0.0     | WA    |
| tweet_count ->protest_count | 0.0     | WI    |
| tweet_count ->protest_count | 0.0     | WV    |
| tweet_count ->protest_count | 0.1253  | WY    |

**Table S2.** National and State-level results of Granger causality analysis for the hypothesis that tweet count Granger causes protest count.
